# Supplementary material for: Fraudulent ID using face morphs: Experiments on human and automatic recognition
Source: PLoS One. 2017 Mar 22;12(3):e0173319. doi: 10.1371/journal.pone.0173319 (PMC5362102; doi:10.1371/journal.pone.0173319)
Supplement: S1 Table — (XLSX) [file pone.0173319.s001.xlsx]

## Sheet: Expt 1
	1	0.9	0.7	0.5	0.3	0.1	0
s1	100	100	100	86	14	14	0
s2	86	100	100	86	43	0	0
s3	100	100	100	100	29	14	14
s4	100	100	100	57	0	29	0
s5	100	86	71	0	43	29	14
s6	86	100	86	86	14	14	14
s7	100	100	100	86	43	14	14
s8	86	100	86	86	14	14	0
s9	71	71	71	57	14	14	0
s10	71	86	100	71	57	29	0
s11	57	57	57	57	14	14	29
s12	100	100	100	29	14	14	0
s13	100	100	86	71	29	29	0
s14	100	86	100	86	86	14	14
s15	100	86	100	86	43	14	14
s16	100	86	86	29	29	0	14
s17	57	86	57	71	14	14	0
s18	100	86	100	71	43	43	0
s19	100	100	100	57	43	14	0
s20	86	100	100	86	43	14	14
s21	100	100	86	57	29	0	0
s22	100	100	100	71	57	0	29
s23	86	71	100	71	43	29	0
s24	100	100	100	86	57	0	14
s25	86	43	86	71	14	14	29
s26	100	100	86	100	14	29	14
s27	86	100	86	43	43	29	0
s28	86	86	86	43	29	0	0

## Sheet: Expt 2 responses
	Match responses							Mismatch responses							Morph responses
	1	0.9	0.7	0.5	0.3	0.1	0	1	0.9	0.7	0.5	0.3	0.1	0	1	0.9	0.7	0.5	0.3	0.1	0
s1	100	86	14	14	14	29	0	0	14	14	14	14	71	71	0	0	72	72	72	0	29
s2	100	100	86	29	14	0	0	0	0	0	43	43	86	100	0	0	14	28	43	14	0
s3	100	86	0	0	0	0	0	0	0	0	0	0	86	100	0	14	100	100	100	14	0
s4	85.7143	57	43	29	29	0	14.29	0	0	14	14	43	86	71.42	14.2857	43	43	57	28	14	14.29
s5	85.7143	100	57	0	14	14	0	14.2857	0	0	0	57	71	71	0	0	43	100	29	15	29
s6	85.7143	71	86	29	29	0	0	0	14	14	43	29	71	100	14.2857	15	0	28	42	29	0
s7	85.7143	86	14	0	0	0	0	0	14	29	0	71	86	100	14.2857	0	57	100	29	14	0
s8	85.7143	86	14	14	29	43	43	14.2857	14	0	14	0	43	57	0	0	86	72	71	14	0
s9	85.7143	71	29	0	14	14	0	0	0	14	0	43	57	86	14.2857	29	57	100	43	29	14
s10	85.7143	86	86	57	0	0	0	14.2857	14	0	14	29	43	43	0	0	14	29	71	57	57
s11	85.7143	71	71	29	0	29	14.29	0	29	0	0	29	71	71.42	14.2857	0	29	71	71	0	14.29
s12	57.1429	71	0	0	14	14	14	14.2857	14	0	0	0	43	57	28.5714	15	100	100	86	43	29
s13	100	86	86	57	14	14	0	0	0	14	0	43	57	100	0	14	0	43	43	29	0
s14	100	71	86	71	14	14	0	0	14	0	14	29	14	57	0	15	14	15	57	72	43
s15	85.7143	71	0	0	0	29	14	14.2857	14	0	14	29	71	86	0	15	100	86	71	0	0
s16	71.4286	100	29	0	0	0	0	28.5714	0	0	4	29	86	100	0	0	71	96	71	14	0
s17	100	86	14	43	0	14	14	0	0	14	0	29	71	57	0	14	72	57	71	15	29
s18	85.7143	71	57	29	14	0	0	0	0	0	0	29	71	86	14.2857	29	43	71	57	29	14
s19	100	100	43	0	43	14	14	0	0	29	14	14	86	86	0	0	28	86	43	0	0
s20	71.4286	100	43	71	14	0	0	0	0	14	14	14	57	71	28.5714	0	43	15	72	43	29
s21	100	100	86	14	0	0	14.28	0	0	0	14	43	100	71.4343	0	0	14	72	57	0	14.2857
s22	85.7143	86	57	86	0	14	0	0	0	0	0	29	43	57	14.2857	14	43	14	71	43	43
s23	71.4286	71	14	14	14	14	0	14.2857	14	14	0	29	57	100	14.2857	15	72	86	57	29	0
s24	100	71	29	0	29	43	14	0	0	0	0	0	57	86	0	29	71	100	71	0	0
s25	85.7143	57	57	43	29	14	14	14.2857	14	29	29	57	57	57	0	29	14	28	14	29	29
s26	71.4286	57	14	0	0	0	0	0	14	0	0	29	71	57	28.5714	29	86	100	71	29	43
s27	85.7143	100	14	14	0	14	29	14.2857	0	0	0	0	71	57	0	0	86	86	100	15	14
s28	85.7143	71	71	57	57	43	43	0	14	14	0	14	14	14	14.2857	15	15	43	29	43	43
s29	85.7143	100	0	29	0	57	14	0	0	14	14	29	43	29	14.2857	0	86	57	71	0	57
s30	85.7143	100	43	0	14	14	0	0	0	0	0	29	71	100	14.2857	0	57	100	57	15	0
s31	100	86	0	0	0	14	14	0	0	0	0	14	71	86	0	14	100	100	86	15	0
s32	85.7143	100	57	14	43	14	29	14.2857	0	0	0	14	43	71	0	0	43	86	43	43	0
s33	85.7143	100	71	43	14	0	0	0	0	0	0	14	43	86	14.2857	0	29	57	72	57	14
s34	57.1429	57	0	0	0	29	0	14.2857	29	14	14	43	29	86	28.5714	14	86	86	57	42	14
s35	100	100	29	0	0	0	14	0	0	0	0	43	86	86	0	0	71	100	57	14	0
s36	85.7143	100	43	29	0	14	0	0	0	0	0	29	86	100	14.2857	0	57	71	71	0	0
s37	100	71	14	0	14	14	0	0	0	14	0	43	86	100	0	29	72	100	43	0	0
s38	42.8571	71	71	29	14	0	0	14.2857	0	0	29	57	100	71	42.8571	29	29	42	29	0	29
s39	100	57	43	0	0	29	14	0	43	14	0	29	57	86	0	0	43	100	71	14	0
s40	71.4286	86	14	14	0	0	0	14.2857	0	0	0	29	86	71	14.2857	14	86	86	71	14	29
s41	100	86	86	43	43	14	0	0	0	0	0	0	57	71	0	14	14	57	57	29	29
s42	85.7143	43	29	0	0	14	0	14.2857	14	0	0	29	57	71	0	43	71	100	71	29	29

## Sheet: Expt 2 match & morph detect
	GFMT matching accuracy	GFMT match items	GFMT Mismatch items	50/50 Morph detection accuracy
s1	85.5	100	71	72
s2	100	100	100	28
s3	100	100	100	100
s4	78.5671	85.7143	71.42	57
s5	78.3571	85.7143	71	100
s6	92.8571	85.7143	100	28
s7	92.8571	85.7143	100	100
s8	71.3571	85.7143	57	72
s9	85.8571	85.7143	86	100
s10	64.3571	85.7143	43	29
s11	78.5671	85.7143	71.42	71
s12	57.0714	57.1429	57	100
s13	100	100	100	43
s14	78.5	100	57	15
s15	85.8571	85.7143	86	86
s16	85.7143	71.4286	100	96
s17	78.5	100	57	57
s18	85.8571	85.7143	86	71
s19	93	100	86	86
s20	71.2143	71.4286	71	15
s21	85.7171	100	71.4343	72
s22	71.3571	85.7143	57	14
s23	85.7143	71.4286	100	86
s24	93	100	86	100
s25	71.3571	85.7143	57	28
s26	64.2143	71.4286	57	100
s27	71.3571	85.7143	57	86
s28	49.8571	85.7143	14	43
s29	57.3571	85.7143	29	57
s30	92.8571	85.7143	100	100
s31	93	100	86	100
s32	78.3571	85.7143	71	86
s33	85.8571	85.7143	86	57
s34	71.5714	57.1429	86	86
s35	93	100	86	100
s36	92.8571	85.7143	100	71
s37	100	100	100	100
s38	56.9286	42.8571	71	42
s39	93	100	86	100
s40	71.2143	71.4286	71	86
s41	85.5	100	71	57
s42	78.3571	85.7143	71	100

## Sheet: Expt 3
	1	0.9	0.7	0.5	0.3	0.1	0
s1	100	100	100	40	0	0	0
s2	70	100	90	70	0	0	0
s3	70	50	0	0	0	0	0
s4	78	80	60	0	0	0	0
s5	100	100	90	20	0	0	0
s6	100	100	100	0	0	0	0
s7	50	50	40	0	0	0	0
s8	100	100	80	0	0	0	0
s9	100	90	10	0	0	0	0
s10	90	100	100	100	70	10	0
s11	100	90	40	0	0	0	0
s12	100	100	100	100	80	20	0
s13	100	100	100	0	0	0	0
s14	100	50	0	0	0	0	0
s15	100	90	20	0	0	0	0
s16	100	100	80	0	0	0	0
s17	100	100	100	50	0	0	0
s18	100	40	60	0	0	0	0
s19	100	100	100	100	0	0	0
s20	80	90	80	60	10	0	0
